# Supplementary material
Source: MDPI journal article supplement (https://www.mdpi.com/2072-4292/15/11/2797)
Supplement: s1 [file s1]

## Supplementary Material

for

### **Drone-based imaging polarimetry of dark lake patches from the viewpoint of flying polarotactic insects with ecological implication**

**Dénes Száz, Péter Takács, Balázs Bernáth, György Kriska, András Barta, István Pomozi, Gábor Horváth<sup>1,\*</sup>**

*<sup>1</sup>Environmental Optics Laboratory, Department of Biological Physics, ELTE Eötvös Loránd University, H-1117 Budapest, Pázmány sétány 1, Hungary,*

*\*Corresponding author: gh@arago.elte.hu*

This file contains the following: Supplementary Figures S1-S8 with captions

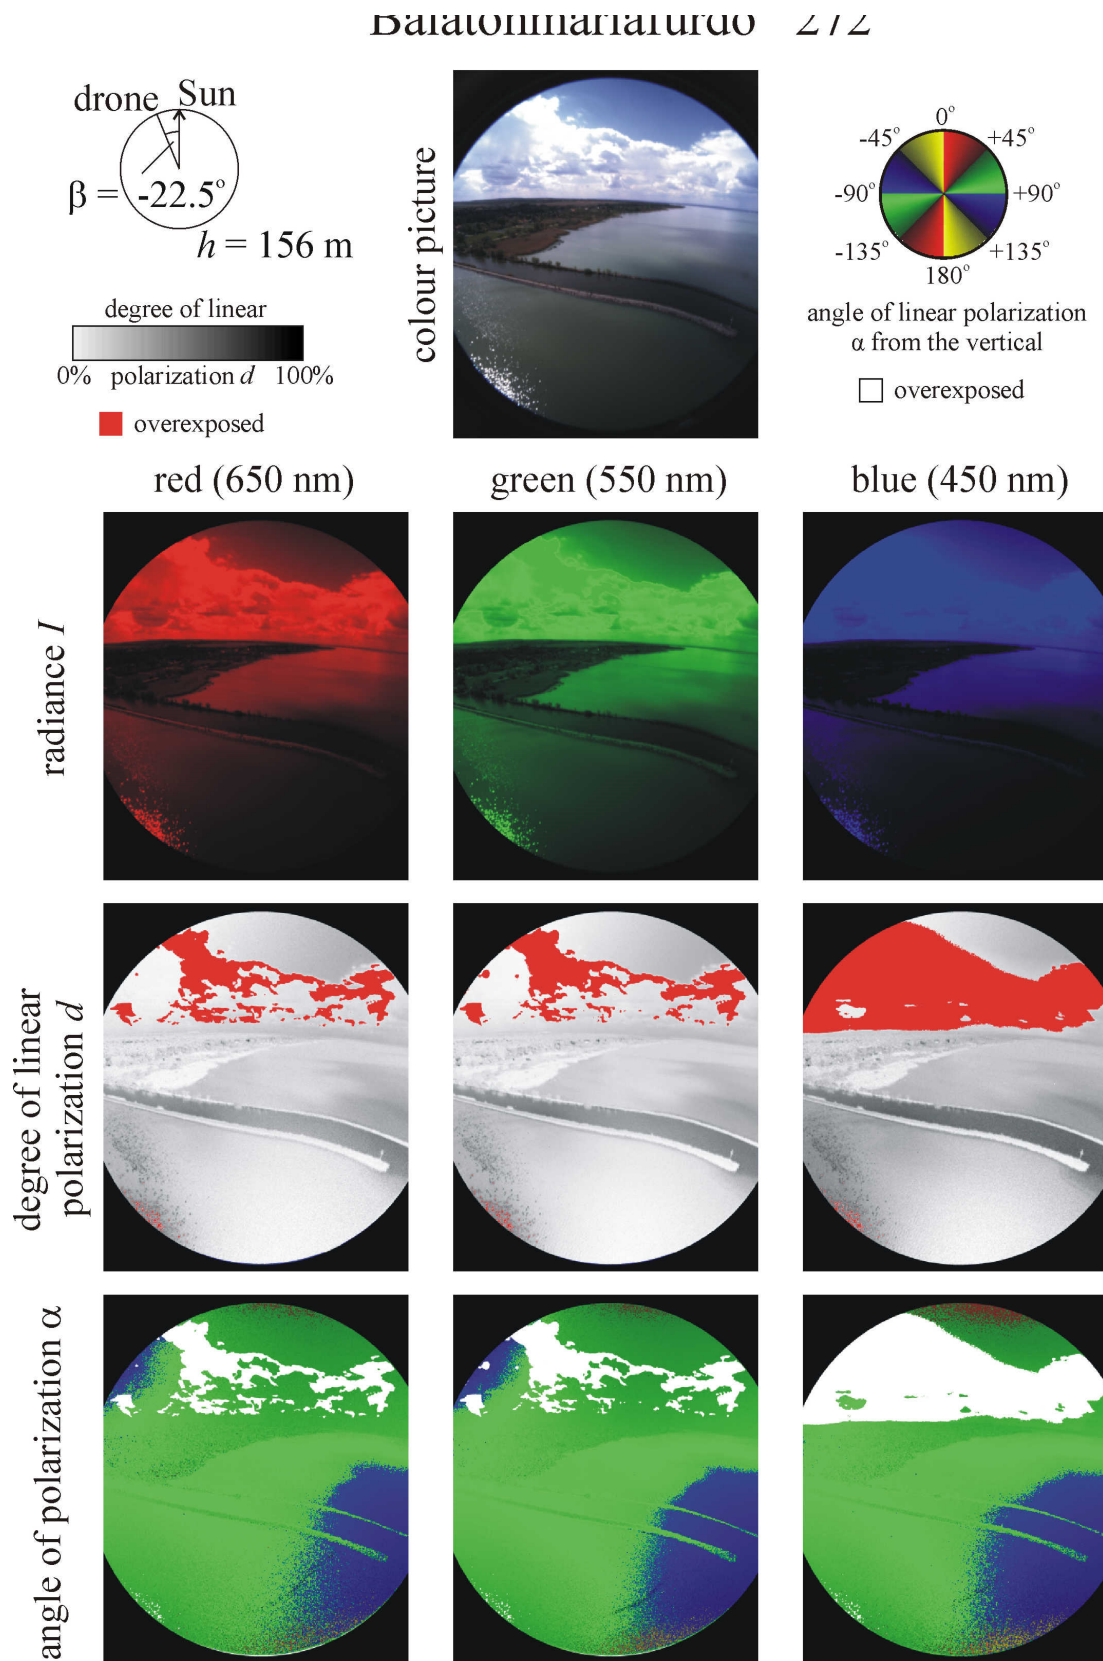

**Supplementary Figure S1.** Colour picture and patterns of the radiance  $I$ , degree of linear polarization  $d$  and angle of polarization  $\alpha$  of lake Balaton at the harbour of Balatonmariafurdo ( $46^\circ 42' 22'' \text{ N}$ ,  $17^\circ 22' 14'' \text{ E}$ ) measured with drone-based imaging polarimetry from height  $h = 156 \text{ m}$  in the red (650 nm), green (550 nm) and blue (450 nm) spectral ranges on 3 May 2022 at 13:48:13 (= UTC + 2 h). In the  $\alpha$ -patterns the white bars show the local directions of polarization. The azimuth angle of the drone's optical axis is  $\beta = -22.5^\circ$  clockwise from the solar meridian.

## Balatonmariafurdo 097

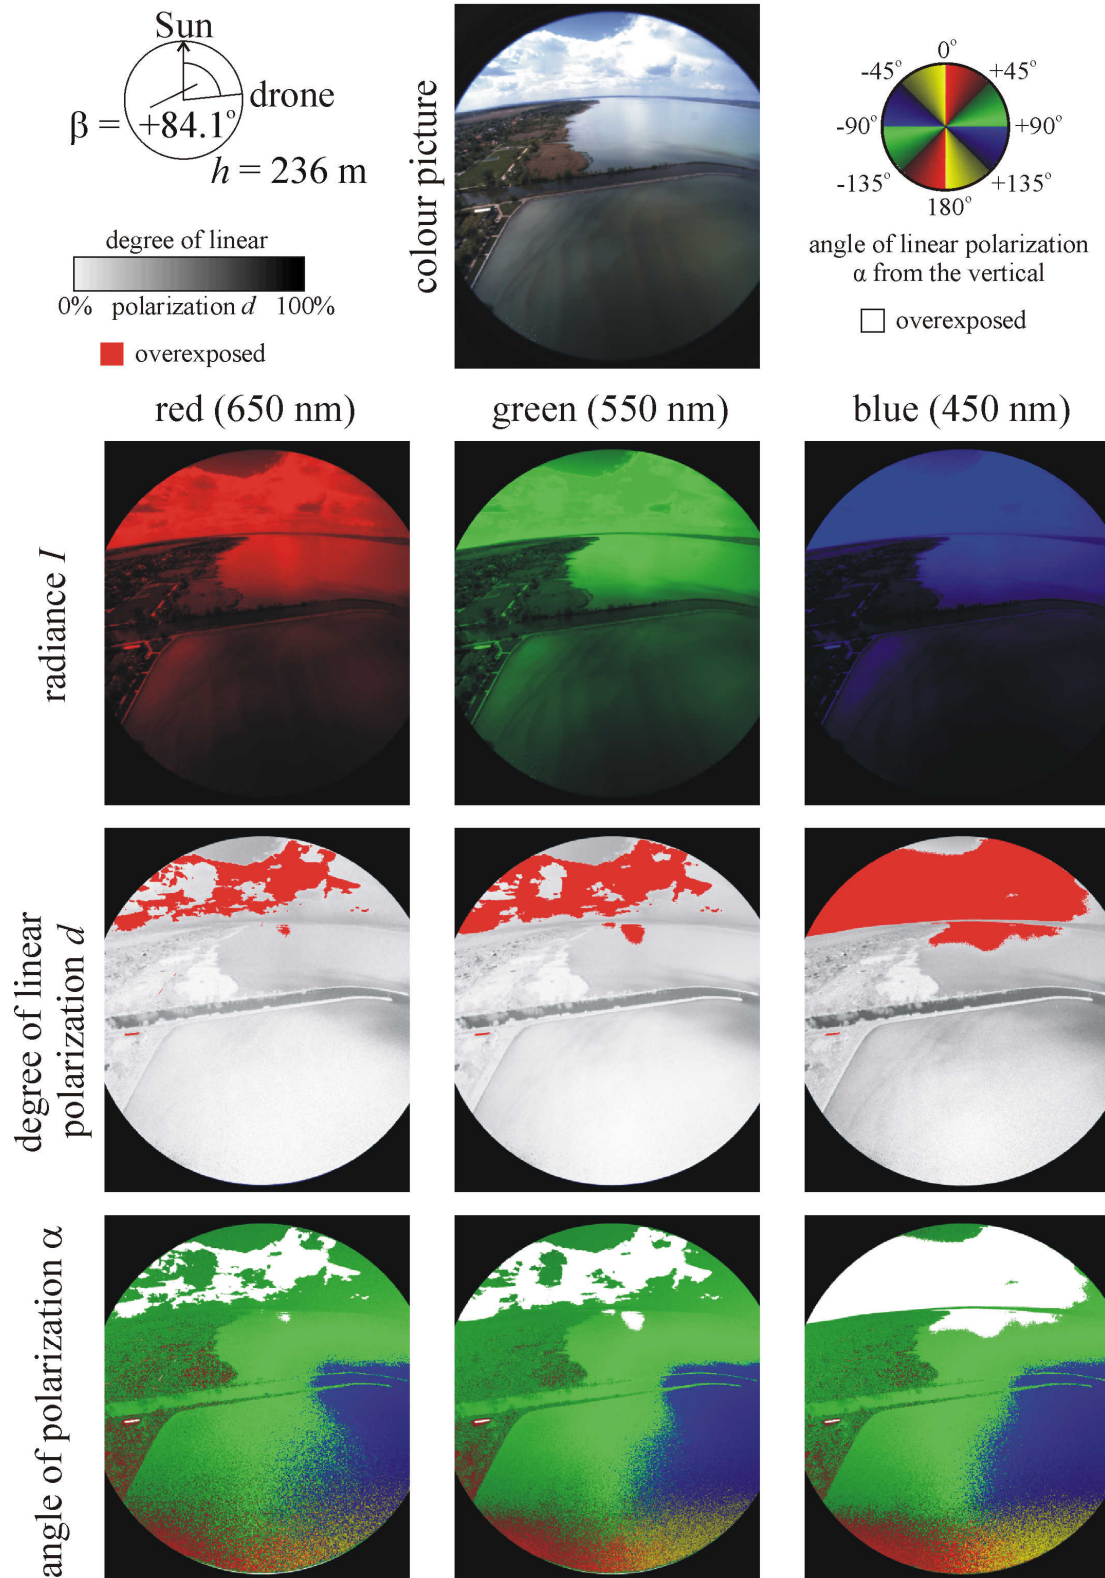

**Supplementary Figure S2.** Colour picture and patterns of the radiance  $I$ , degree of linear polarization  $d$  and angle of polarization  $\alpha$  of lake Balaton at the harbour of Balatonmariafurdo ( $46^\circ 42' 22'' \text{ N}$ ,  $17^\circ 22' 14'' \text{ E}$ ) measured with drone-based imaging polarimetry from height  $h = 236 \text{ m}$  in the red (650 nm), green (550 nm) and blue (450 nm) spectral ranges on 3 May 2022 at 13:42:23 (= UTC + 2 h). In the  $\alpha$ -patterns the white bars show the local directions of polarization. The azimuth angle of the drone's optical axis is  $\beta = +84.1^\circ$  clockwise from the solar meridian.



## estuary of river Zala 333

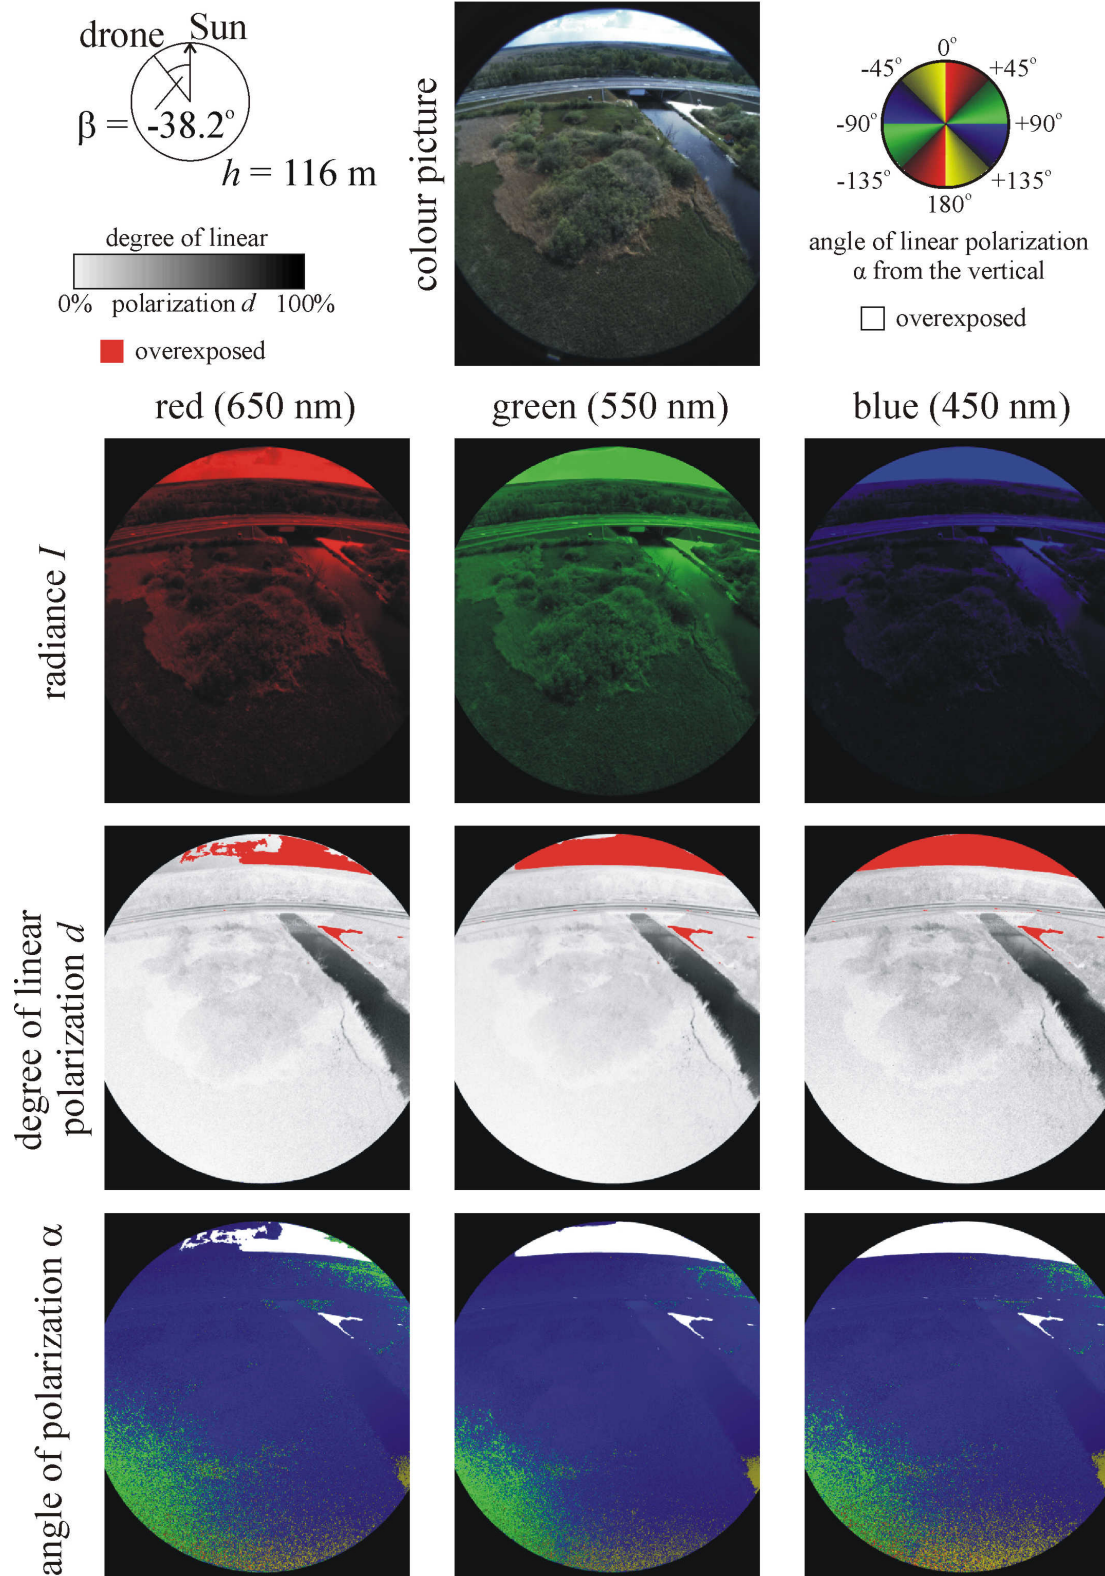

**Supplementary Figure S3.** Colour picture and patterns of the radiance  $I$ , degree of linear polarization  $d$  and angle of polarization  $\alpha$  of lake Balaton at the estuary of river Zala ( $46^\circ 42' 21'' \text{ N}$ ,  $17^\circ 15' 53'' \text{ E}$ ) measured with drone-based imaging polarimetry from height  $h = 116 \text{ m}$  in the red (650 nm), green (550 nm) and blue (450 nm) spectral ranges on 3 May 2022 at 15:06:46 (= UTC + 2 h). In the  $\alpha$ -patterns the white bars show the local directions of polarization. The azimuth angle of the drone's optical axis is  $\beta = -38.2^\circ$  clockwise from the solar meridian.



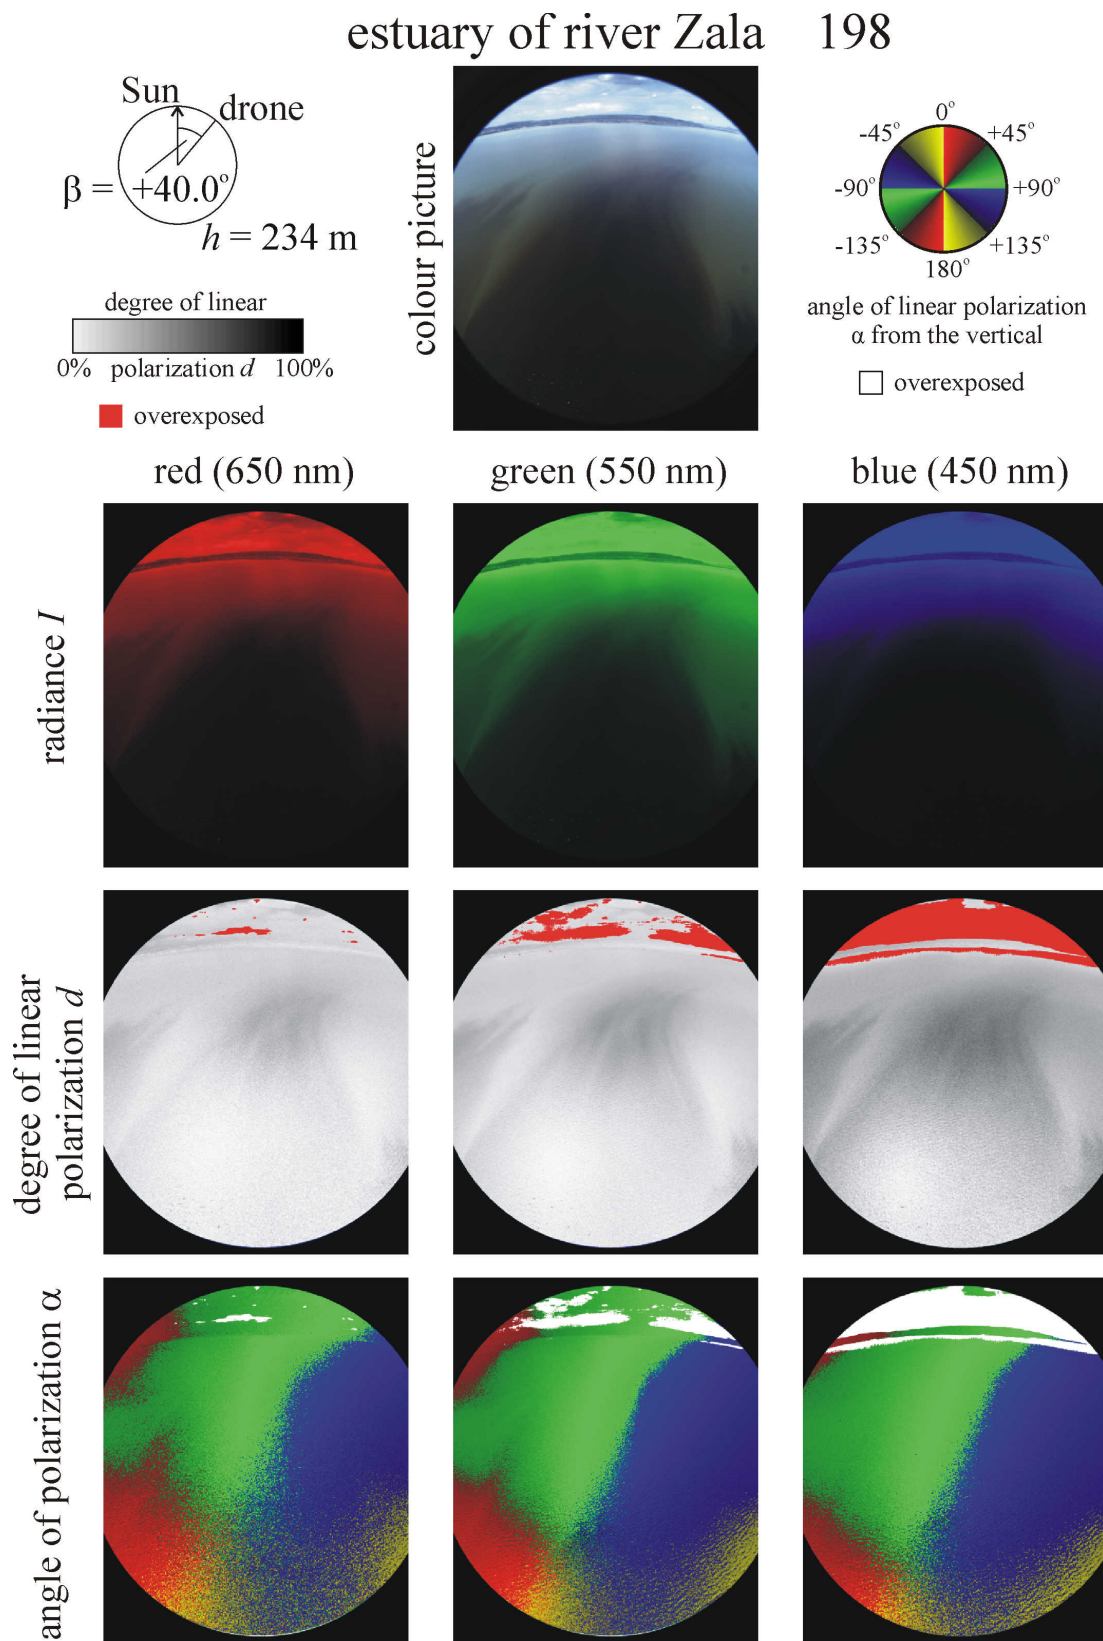

**Supplementary Figure S4.** Colour picture and patterns of the radiance  $I$ , degree of linear polarization  $d$  and angle of polarization  $\alpha$  of lake Balaton at the estuary of river Zala ( $46^\circ 42' 21''$  N,  $17^\circ 15' 53''$  E) measured with drone-based imaging polarimetry from height  $h = 234$  m in the red (650 nm), green (550 nm) and blue (450 nm) spectral ranges on 3 May 2022 at 15:02:14 (= UTC + 2 h). In the  $\alpha$ -patterns the white bars show the local directions of polarization. The azimuth angle of the drone's optical axis is  $\beta = +40.0^\circ$  clockwise from the solar meridian.

## estuary of river Zala 154

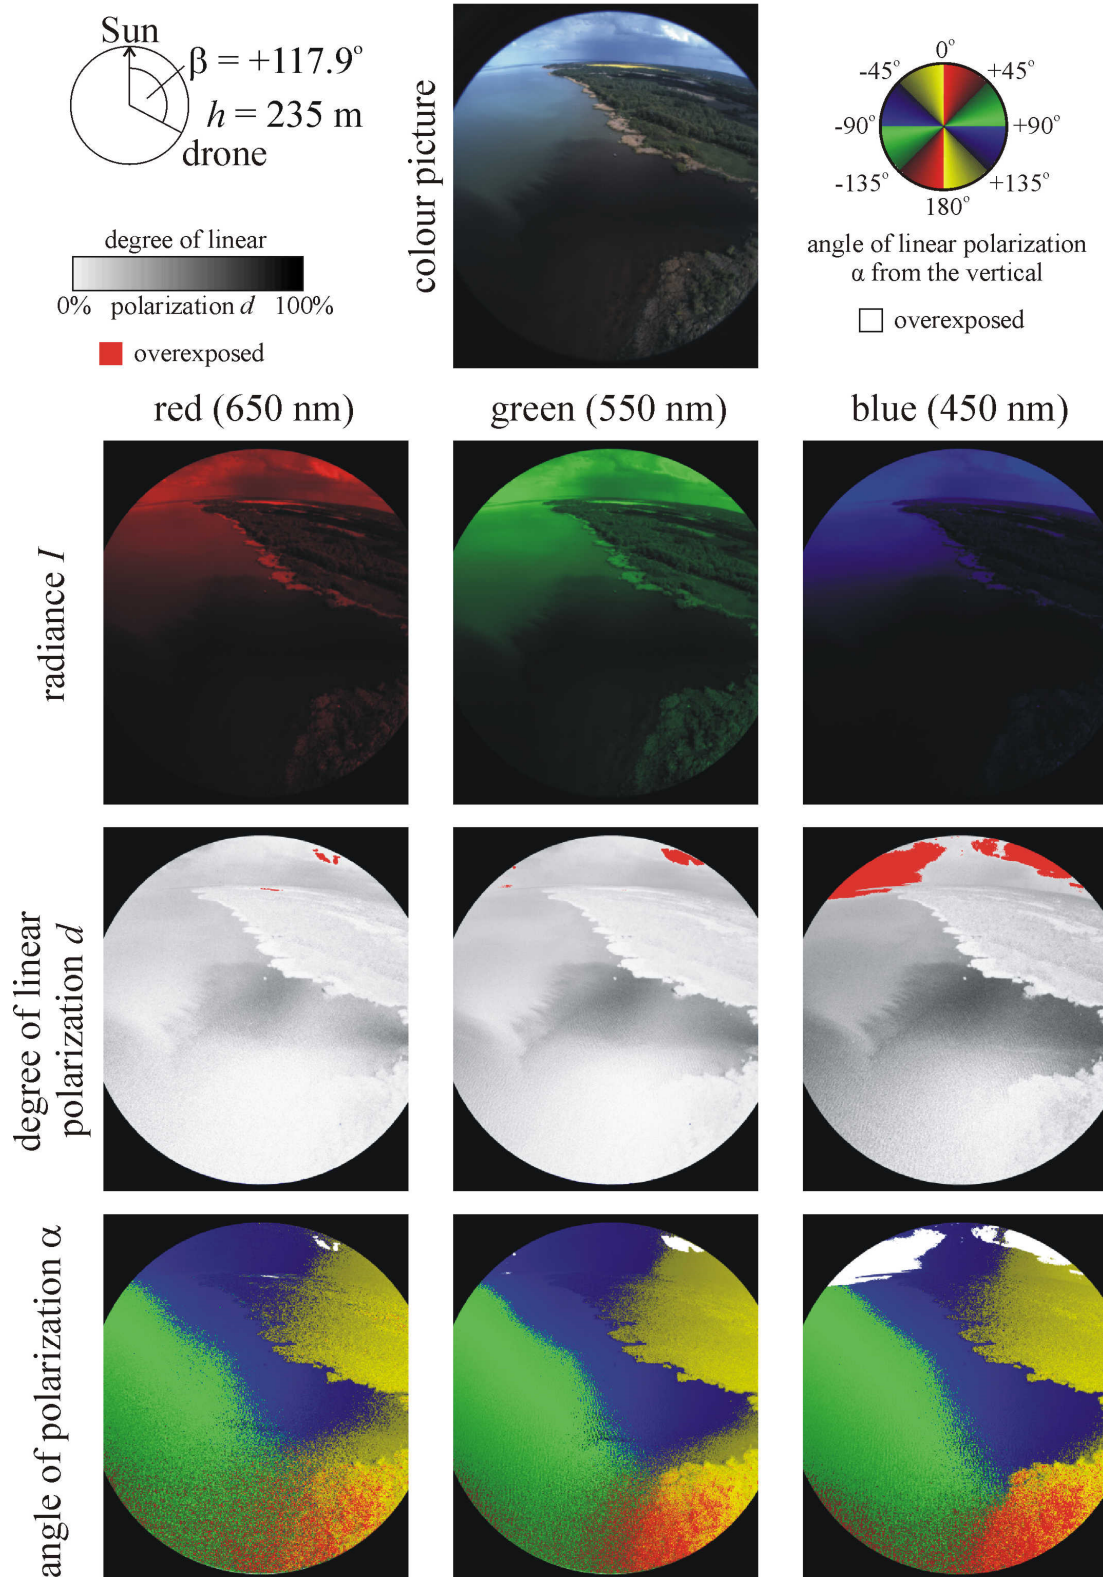

**Supplementary Figure S5.** Colour picture and patterns of the radiance  $I$ , degree of linear polarization  $d$  and angle of polarization  $\alpha$  of lake Balaton at the estuary of river Zala ( $46^\circ 42' 21'' \text{ N}$ ,  $17^\circ 15' 53'' \text{ E}$ ) measured with drone-based imaging polarimetry from height  $h = 235 \text{ m}$  in the red (650 nm), green (550 nm) and blue (450 nm) spectral ranges on 3 May 2022 at 15:00:46 (= UTC + 2 h). In the  $\alpha$ -patterns the white bars show the local directions of polarization. The azimuth angle of the drone's optical axis is  $\beta = +117.9^\circ$  clockwise from the solar meridian.

## Balatonfenyves 291

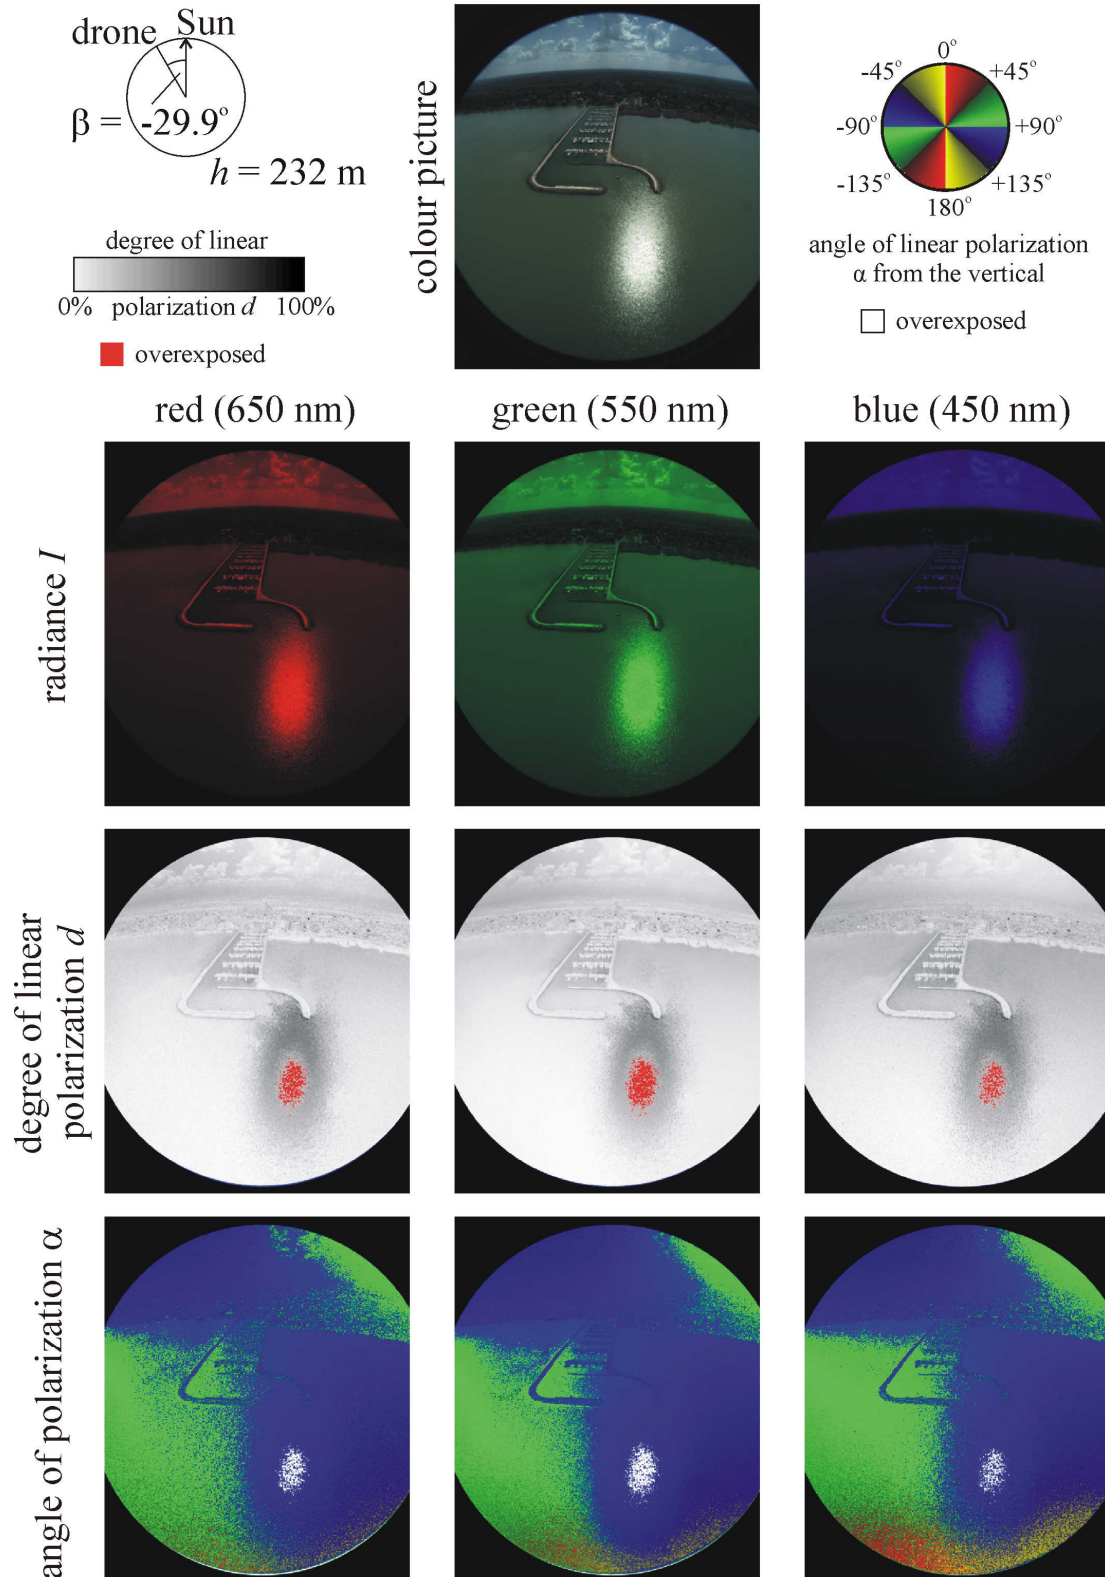

**Supplementary Figure S6.** Colour picture and patterns of the radiance  $I$ , degree of linear polarization  $d$  and angle of polarization  $\alpha$  of lake Balaton at the harbour of Balatonfenyves ( $46^\circ 42' 39'' \text{ N}$ ,  $17^\circ 28' 40'' \text{ E}$ ) measured with drone-based imaging polarimetry from height  $h = 232 \text{ m}$  in the red (650 nm), green (550 nm) and blue (450 nm) spectral ranges on 3 May 2022 at 12:30:54 (= UTC + 2 h). In the  $\alpha$ -patterns the white bars show the local directions of polarization. The azimuth angle of the drone's optical axis is  $\beta = -29.9^\circ$  clockwise from the solar meridian.



## Balatonfenyves 452

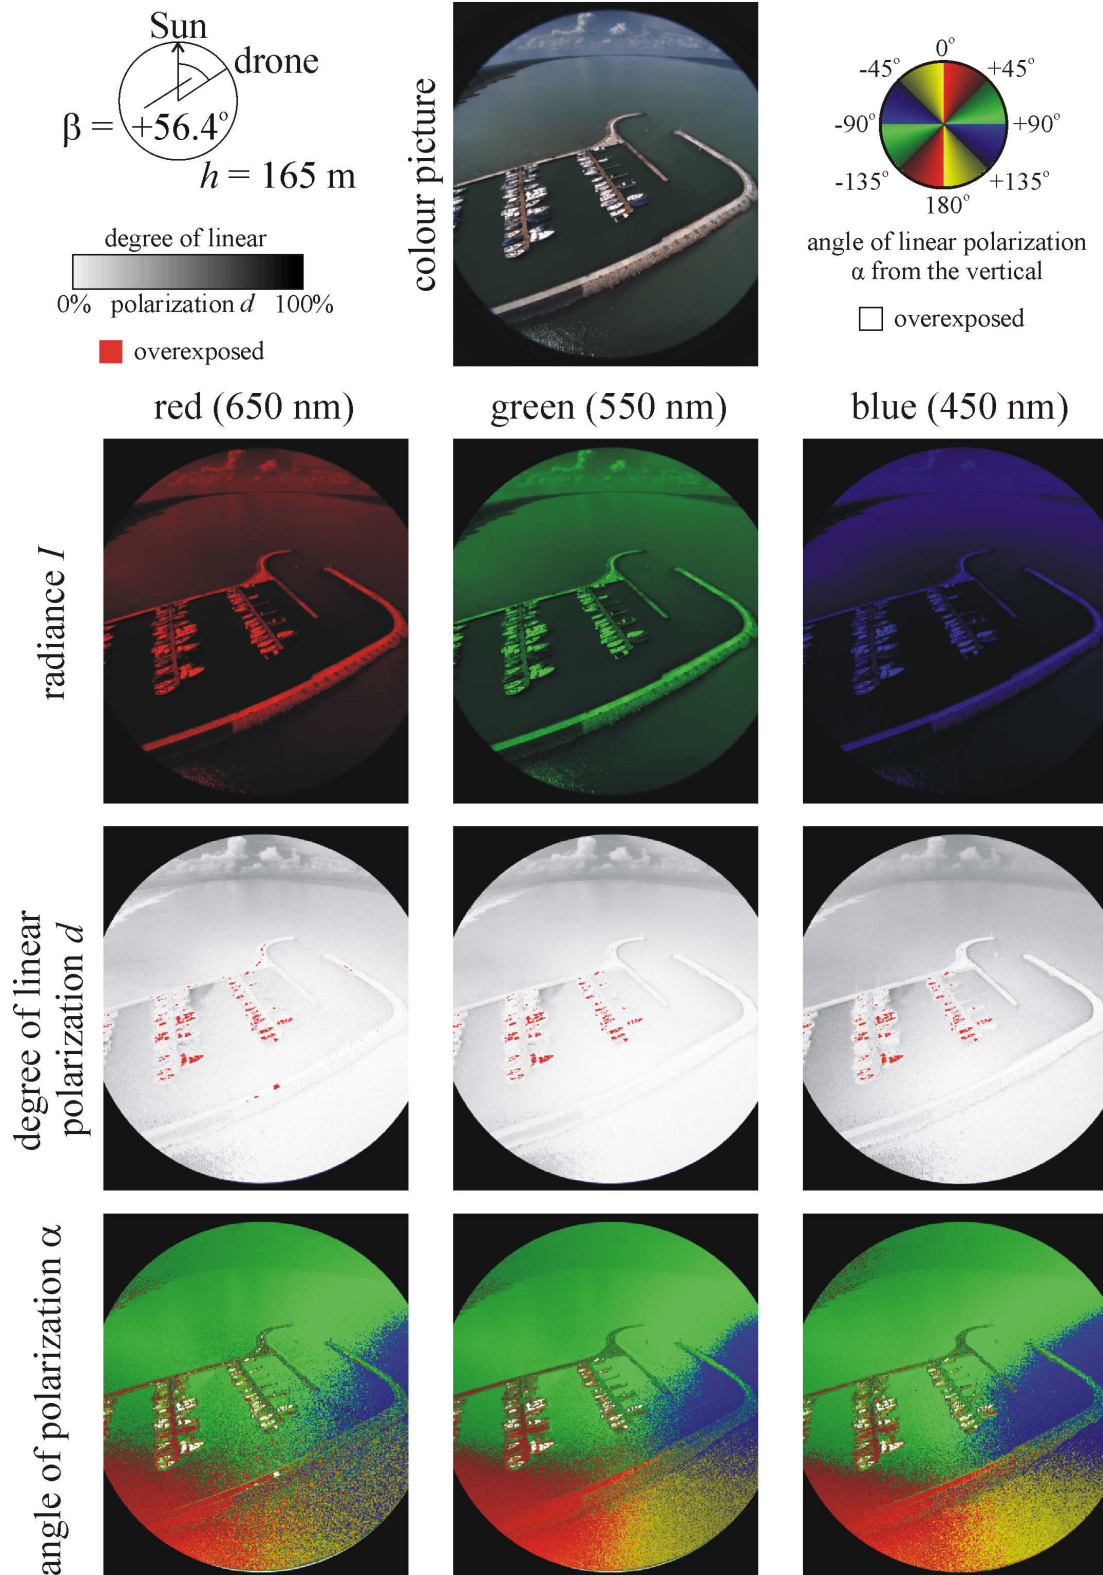

**Supplementary Figure S7.** Colour picture and patterns of the radiance  $I$ , degree of linear polarization  $d$  and angle of polarization  $\alpha$  of lake Balaton at the harbour of Balatonfenyves ( $46^\circ 42' 39''$  N,  $17^\circ 28' 40''$  E) measured with drone-based imaging polarimetry from height  $h = 165$  m in the red (650 nm), green (550 nm) and blue (450 nm) spectral ranges on 3 May 2022 at 12:36:17 (= UTC + 2 h). In the  $\alpha$ -patterns the white bars show the local directions of polarization. The azimuth angle of the drone's optical axis is  $\beta = +56.4^\circ$  clockwise from the solar meridian.

## Balatonfenyves 345

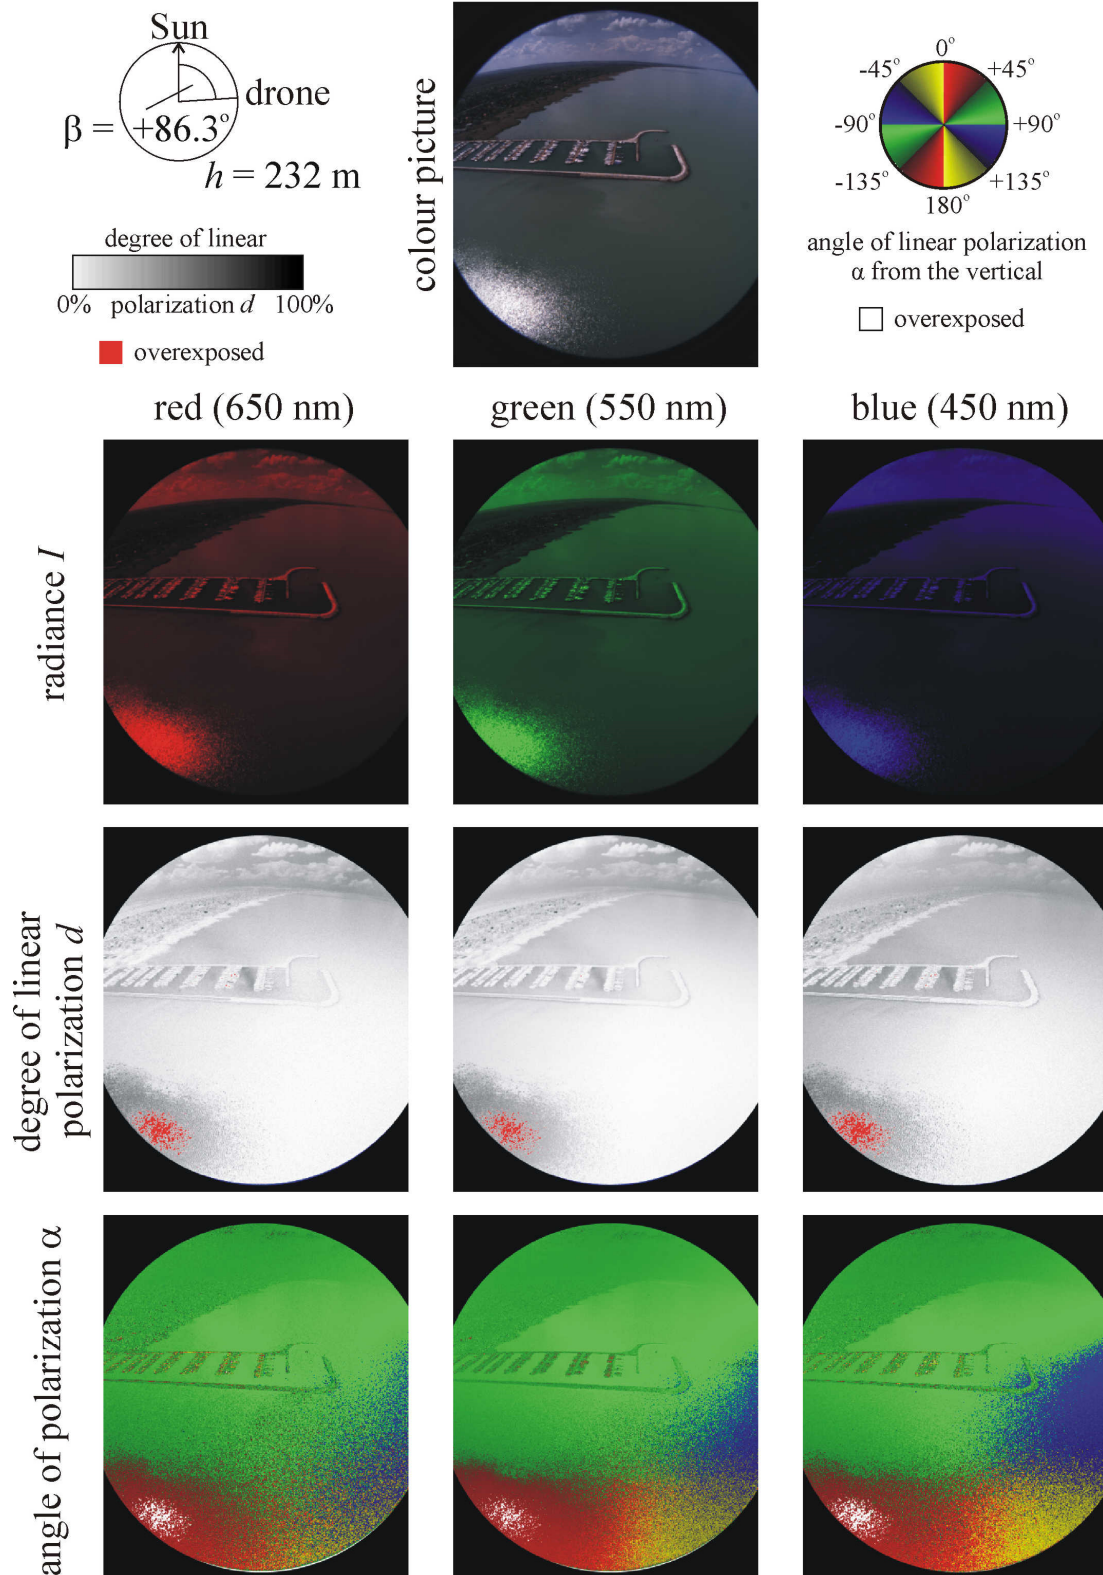

**Supplementary Figure S8.** Colour picture and patterns of the radiance  $I$ , degree of linear polarization  $d$  and angle of polarization  $\alpha$  of lake Balaton at the harbour of Balatonfenyves ( $46^\circ 42' 39''$  N,  $17^\circ 28' 40''$  E) measured with drone-based imaging polarimetry from height  $h = 232$  m in the red (650 nm), green (550 nm) and blue (450 nm) spectral ranges on 3 May 2022 at 12:32:42 (= UTC + 2 h). In the  $\alpha$ -patterns the white bars show the local directions of polarization. The azimuth angle of the drone's optical axis is  $\beta = +86.3^\circ$  clockwise from the solar meridian.
